# Supplementary material
Source: PubMed Central journal article supplement (PMC3724614)
Supplement: supp_M113.472290_jbc.M113.472290-1.pdf [file supp_M113.472290_jbc.M113.472290-1.pdf]

## Supplemental Information

|                       |             |                       |               |             |             |             |                |     |
|-----------------------|-------------|-----------------------|---------------|-------------|-------------|-------------|----------------|-----|
| <i>S.cerevisiae</i> : | MSSQEYTFI   | DIPVTRAQVE            | HCSYSFWSSL    | YPKYVPSIV   | LKSLPKKFIQ  | YLEQDGIKLP  | QEENSRSVYT     | 70  |
| <i>S.pombe</i> :      | -----M      | TLILTKNOVL            | HCQFSSWYSL    | FRKLTPKAKV  | IKPIPATVLK  | YLEDHSIYVE  | QPMNTVEEV-     | 60  |
| <i>D.rerio</i> :      | -----       | ---MKKEQVV            | NCQFSVWYPL    | FKKHTIKSL-  | ILPIEQNVID  | YLLDDGTLVV  | SGSENNNSQT     | 56  |
| <i>H.sapiens</i> :    | -----       | ---MKKEHVL            | HCQFSAWYFP    | FRGVTIKSV-  | ILPLPQNVKD  | YLLDDGTLVV  | SGRDDPPTH      | 56  |
| <i>A.thaliana</i> :   | -----       | ---MKKEDEVN           | RCQIQNWYPR    | FKSLTIKTK-  | FHKLEESFIN  | YLLDDSGPFL  | LPHSVTNEDA     | 56  |
|                       |             | : . . *               | * . . *       | : . . *     | : * . . .   | ** : * . .  | . . .          |     |
|                       |             |                       |               |             |             |             |                |     |
| <i>S.cerevisiae</i> : | E--EIIRN-E  | DNDYSDWEDD            | EDTATEFVQE    | VEPLIDFPPEL | HQKLDKDALNE | -LCAVAPKLN  | WSAPRDATWI     | 136 |
| <i>S.pombe</i> :      | -----       | -----DSEED            | EESAPAYYPE    | REA-----    | IQLIEKAIKE  | LGCYVVPKLN  | WSTPKDALWI     | 108 |
| <i>D.rerio</i> :      | QANNSDSD--  | EEDIQWT-DD            | ETTTTIVT---   | ---APEFPEF  | NVKVQEAINV  | LGCYVVPKLN  | WSAPRDANWI     | 117 |
| <i>H.sapiens</i> :    | QP-DSDDE--  | AEEIQWS-DD            | ENTATLT---    | ---APEFPEF  | ATKVQEAINS  | LGCYVVPKLN  | WSAPRDAYWI     | 116 |
| <i>A.thaliana</i> :   | MPNRVHNFEE  | EDDFQVPEEA            | SDDEPLN---    | ---RPSFPPEL | EIEIRESIET  | LGTIIPKLN   | WSPKDAAWI      | 120 |
|                       |             | :                     | .             |             | : . . . .   | * : * * * * | ** : * : * * * |     |
|                       |             |                       |               |             |             |             |                |     |
| <i>S.cerevisiae</i> : | LPNNTMKQNE  | VNELYLLLNA            | SNYIMHDLQR    | AFKGCVDGDD  | ----IKGLK   | FDLVLRQWCD  | -MNPALVFRV     | 200 |
| <i>S.pombe</i> :      | TTTGS�KCTT  | AEVLLLLKLS            | SDFVAHDLNH    | AFDDCKDFDN  | ADGSVPKDFS  | FELVLRKWF   | -MHASTVFR      | 177 |
| <i>D.rerio</i> :      | ALNSSLQQS   | LSEIFLLFKS            | SDFITHTLTQ    | PFLHCSDDSP  | ----DPTIN   | YELVLRKWE   | -LIPGGEFR      | 181 |
| <i>H.sapiens</i> :    | AMNSSLQCT   | LSDIFLLFKS            | SDFITRDFTQ    | PFIHCDSDSP  | ----DPCIE   | YELVLRKWE   | -LIPGGEFR      | 180 |
| <i>A.thaliana</i> :   | SPSQNLSTC   | FNEIALFRS             | SDSLTHDLFN    | AYDSCSKVKS  | ----SRPES   | FYLALRKWYP  | SLKPEMFR       | 185 |
|                       | . . . *     | . . . * * * . .       | * : : * : . . | : * *       |             | : * . * : * | : * * * *      |     |
|                       |             |                       |               |             |             |             |                |     |
| <i>S.cerevisiae</i> : | FVKNAHIVGA  | TQRDL-NYVD            | YLDELSDTFK    | DLTDEIVHDV  | VLPKFPDKSF  | VLDVYIIPRF  | NKIFVIDINP     | 269 |
| <i>S.pombe</i> :      | FVKSKRLIAF  | QRDD-NYVE             | FLKENIDCYE    | KLISDLLKK-  | -LDTEPDPDF  | VFDVYIHK--  | DRAWLIDINP     | 242 |
| <i>D.rerio</i> :      | FVKENKLI    | CORDYTQHYQ            | HIGKQEAIS     | TSLQFFRDN   | IQYQEPDEF   | VLDVYRDS-   | GRVWLDINP      | 250 |
| <i>H.sapiens</i> :    | FVKENKLI    | SORDYTQYD             | HISKQKEEIR    | RCIQDFKHK   | IQYKFLDEF   | VFDIYRDS-   | GKVWLDINP      | 249 |
| <i>A.thaliana</i> :   | FVKSNELVGI  | QREVTTFP              | VLLNEKDLLK    | GLIEEFDDK   | IRFEISENY   | TFDVYVTK-   | RRVWLDINP      | 254 |
|                       | * * . . . . | * : . *               | : :           | * : . . .   | * . . .     | . : * * *   | : : * * *      |     |
|                       |             |                       |               |             |             |             |                |     |
|                       |             | <i>cdc123-1</i> E283K |               |             |             |             | $\Delta$ 327   |     |
| <i>S.cerevisiae</i> : | FARKTDSLLF  | SWNEIAAIAP            | PKNDVE----    | ----DYELRL  | VTRHNTGRFA  | SKEHSENV    | QDLVEASLNP     | 331 |
| <i>S.pombe</i> :      | FYPRTDGLLF  | SWSELESMS             | ENM-----      | ----KPEIRL  | IPKGSMPSTG  | SAKYTYNRVP  | EDMIAASE-G     | 300 |
| <i>D.rerio</i> :      | FGEVTDLLF   | TWEELTSGKN            | LITANQTQEE    | ALPDGPAFRC  | TNSEV--TVQ  | PSPCLSYRIP  | RDFLDLTT-G     | 317 |
| <i>H.sapiens</i> :    | FGEVTDLLF   | TWEELISENN            | LNGDFSEVDA    | QEQDSPAFC   | TNSEV--TVQ  | PSPYLSYRIP  | KDFVLDLST-G    | 316 |
| <i>A.thaliana</i> :   | WCGSTLPLMY  | TWEELKIHG             | EC---D----    | ----ELELRI  | VESR---LS   | VLPGLKTAVP  | YDYLVDVSA-G    | 308 |
|                       | : *         | * : . *               | : * * :       | : *         |             | : *         | : * : :        |     |
|                       |             |                       |               |             |             |             |                |     |
| <i>S.cerevisiae</i> : | EAIRELTKW   | KELLSQAKE             | ESSDSENET-    | -           |             |             |                | 360 |
| <i>S.pombe</i> :      | ENLLEFAQKW  | QDLTNSNE-             | -----         | -           |             |             |                | 319 |
| <i>D.rerio</i> :      | EDAYKLIDFL  | KLKRGQEEE             | EESNEEGEEP    | Q           |             |             |                | 348 |
| <i>H.sapiens</i> :    | EDAHKLIDFL  | KLKRNQEDD             | -----         | -           |             |             |                | 336 |
| <i>A.thaliana</i> :   | SGWAQVLKIV  | EETF--QKDD            | QSSDEVA---    | -           |             |             |                | 333 |
|                       | . . . .     | : . . .               | : . . .       |             |             |             |                |     |

**Figure S1. Alignment of Cdc123 orthologs.**

Cdc123 orthologs from *Saccharomyces cerevisiae*, *Schizosaccharomyces pombe*, *Danio rerio*, *Homo sapiens* and *Arabidopsis thaliana* were aligned with ClustalΩ (clustal consensus is shown below the aligned sequences). Residues that are conserved in 5 or 4 species are highlighted in black and grey, respectively. The amino acid substitution (E283K) resulting from the *cdc123-1* mutant allele (G847A) as well as the last residue of the truncated version encoded by the *cdc123Δ327* mutant allele are indicated.

**Table S1. Yeast strains**

| name     | relevant genotype                                                                      | back-ground | used in Figure |
|----------|----------------------------------------------------------------------------------------|-------------|----------------|
| BY4741   | <i>MATa his3Δ1 leu2Δ0 ura3Δ0 met15Δ0</i>                                               | S288c       | 1A, 1B, 2D, 3A |
| W4050    | <i>MATa cdc123-1-ha3-URA3</i>                                                          | S288c       | 1A             |
| W3702    | <i>MATa cdc123Δ327-ha3-natMX4</i>                                                      | S288c       | 1A, 2D         |
| W3439    | <i>MATa cdc123-1-ha3-URA3<br/>can1Δ::MFA1pr-HIS3-MFAalpha1pr-LEU2</i>                  | S288c       | 1B             |
| W3129    | <i>MATa cdc123Δ327-ha3-natMX4<br/>can1Δ::MFA1pr-HIS3-MFAalpha1pr-LEU2</i>              | S288c       | 1B, 2B         |
| YTH3 (1) | <i>MATa CDC33(-198,1)::kanMX4-tTA-tetO7</i>                                            | S288c       | 1B             |
| BY4742   | <i>MATa his3Δ1 leu2Δ0 ura3Δ0 lys2Δ0 MET15</i>                                          | S288c       | 1C             |
| W13221   | <i>MATa cdc123Δ327-ha3-natMX4 MET15</i>                                                | S288c       | 1C             |
| W13224   | <i>MATa cdc123-1-ha3-URA3 MET15</i>                                                    | S288c       | 1C             |
| W10897   | <i>MATa p180</i>                                                                       | S288c       | 1D, 1E         |
| W10898   | <i>MATa cdc123Δ327-ha3-natMX4 p180</i>                                                 | S288c       | 1D, 1E         |
| W10899   | <i>MATa gcn2Δ::kanMX6 p180</i>                                                         | S288c       | 1D, 1E         |
| W10900   | <i>MATa gcn2Δ::kanMX6 cdc123Δ327-ha3-natMX4 p180</i>                                   | S288c       | 1D, 1E         |
| W10901   | <i>MATa gcn3Δ::kanMX4 p180</i>                                                         | S288c       | 1D, 1E         |
| W10902   | <i>MATa gcn3Δ::kanMX4 cdc123Δ327-ha3-natMX4 p180</i>                                   | S288c       | 1D, 1E         |
| W10903   | <i>MATa pWS3396</i>                                                                    | S288c       | 1D, 1E         |
| W10904   | <i>MATa cdc123-1-ha3-URA3 pWS3396</i>                                                  | S288c       | 1D, 1E         |
| W10905   | <i>MATa gcn2Δ::kanMX6 pWS3396</i>                                                      | S288c       | 1D, 1E         |
| W10906   | <i>MATa gcn2Δ::kanMX6 cdc123-1-ha3-URA3 pWS3396</i>                                    | S288c       | 1D, 1E         |
| BY4743   | <i>MATa/α his3Δ1/his3Δ1 leu2Δ0/leu2Δ0 ura3Δ0/ura3Δ0<br/>MET15/met15Δ0 LYS2/lys2Δ0</i>  | S288c       | 2A             |
| W4467    | <i>MATa/α GCD11/GCD11-myc13-kanMX6</i>                                                 | S288c       | 2A             |
| W5471    | <i>MATa/α cdc123Δ327-ha3-natMX4/cdc123Δ327-ha3-natMX4<br/>GCD11/GCD11-myc13-kanMX6</i> | S288c       | 2A             |
| W5472    | <i>MATa/α CDC123-ha3-HIS3MX6/CDC123-ha3-HIS3MX6<br/>GCD11/GCD11-myc13-kanMX6</i>       | S288c       | 2A             |
| W4177    | <i>MATa GCD11-myc13-kanMX6</i>                                                         | S288c       | 2B, 3A         |
| K699     | <i>MATa ade2-1 can1-100 his3-11 leu2-3,-112 trp1-1 ura3-2 ssd1</i>                     | W303        | 2C, 2E, 5C, 5D |

**Table S1 (continued). Yeast strains**

| name   | relevant genotype                                                                                                       | back-ground | used in Figure |
|--------|-------------------------------------------------------------------------------------------------------------------------|-------------|----------------|
| W12768 | <i>MATa kanMX4-pGCD11-flag3-GCD11</i>                                                                                   | W303        | 2C             |
| W12770 | <i>MATa kanMX4-pGCD11-flag3-GCD11 cdc123Δ327-ha3-HIS3MX6</i>                                                            | W303        | 2C             |
| W4444  | <i>MATα cdc123Δ::kanMX4 ura3::pGALL-cdc123-1-ha3-URA3</i>                                                               | W303        | 2E             |
| W5294  | <i>MATa CDC123-myc13-kanMX6</i>                                                                                         | S288c       | 3A             |
| W4887  | <i>MATa GCD1-myc13-HIS3MX6</i>                                                                                          | S288c       | 3A             |
| W4884  | <i>MATα GCD11-ha3-HIS3MX6</i>                                                                                           | S288c       | 3B             |
| W5288  | <i>MATα CDC123-ha3-HIS3MX6</i>                                                                                          | S288c       | 3B             |
| W5290  | <i>MATα SUI2-ha3-HIS3MX6</i>                                                                                            | S288c       | 3B             |
| W276   | <i>MATα his3 trp1 ura3::lexAop-lacZ leu2::lexAop-LEU2</i>                                                               | W303        | 4A             |
| W12626 | <i>MATa/α GCD11/gcd11Δ::kanMX6</i>                                                                                      | W303        | 4C, 5A         |
| W12784 | <i>MATa/α GCD11/gcd11Δ::kanMX6 his3/his3::pGCD11-flag3-GCD11-tCYC1-HIS3</i>                                             | W303        | 4C, 4D, 5A     |
| W12786 | <i>MATa/α GCD11/gcd11Δ::kanMX6 his3/his3::pGCD11-flag3-GCD11(aa1-523)-tCYC1-HIS3</i>                                    | W303        | 4C, 4D         |
| W12788 | <i>MATa/α GCD11/gcd11Δ::kanMX6 his3/his3::pGCD11-flag3-GCD11(aa1-519)-tCYC1-HIS3</i>                                    | W303        | 4C, 4D, 5A     |
| W12790 | <i>MATa/α GCD11/gcd11Δ::kanMX6 his3/his3::pGCD11-flag3-GCD11(aa1-514)-tCYC1-HIS3</i>                                    | W303        | 4C, 4D         |
| W12833 | <i>MATa/α GCD11/gcd11Δ::kanMX6 his3/his3::pGCD11-flag3-GCD11(aa1-519)-tCYC1-HIS3 leu2/leu2::pTEF2-CDC123-tCYC1-LEU2</i> | W303        | 5A, 5B         |
| W12949 | <i>MATa/α GCD11/gcd11Δ::kanMX6 leu2/leu2::pTEF2-CDC123-tCYC1-LEU2</i>                                                   | W303        | 5A             |
| W12950 | <i>MATa/α GCD11/gcd11Δ::kanMX6 his3/his3::pGCD11-flag3-GCD11-tCYC1-HIS3 leu2/leu2::pTEF2-CDC123-tCYC1-LEU2</i>          | W303        | 5A             |
| W5539  | <i>MATa cdc123Δ::kanMX4 ura3::pTEF2-SUI2-tCYC1-URA3</i>                                                                 | W303        | 5C, 5D         |
| W5495  | <i>MATa cdc123Δ::kanMX4 leu2::pTEF2-GCD11-tCYC1-LEU2</i>                                                                | W303        | 5C, 5D         |
| W5540  | <i>MATα cdc123Δ::kanMX4 ura3::pTEF2-SUI2-tCYC1-URA3 leu2::pTEF2-GCD11-tCYC1-LEU2</i>                                    | W303        | 5C, 5D         |
| W5544  | <i>MATa cdc123Δ::kanMX4 trp1::pTEF2-SUI3-tCYC1-TRP1 leu2::pTEF2-GCD11-tCYC1-LEU2</i>                                    | W303        | 5C, 5D         |
| W5592  | <i>MATα cdc123Δ::kanMX4 ura3::pTEF2-SUI2-tCYC1-URA3 trp1::pTEF2-SUI3-tCYC1-TRP1 leu2::pTEF2-GCD11-tCYC1-LEU2</i>        | W303        | 5C, 5D         |

**Table S2. Plasmids**

| name       | description                            | vector                        | insert                                                 | used in Figure |
|------------|----------------------------------------|-------------------------------|--------------------------------------------------------|----------------|
| p180 (2)   | <i>pGCN4-lacZ, URA3, ARS/CEN</i>       |                               |                                                        | 1D, 1E         |
| pWS3396    | <i>pGCN4-lacZ, LEU2, ARS/CEN</i>       | pRS315<br>(SalI/PstI)         | SalI/PstI<br>fragment of<br>p180                       | 1D, 1E         |
| pWS1389    | <i>prha-his6-CDC123</i>                | pJOE4056.2<br>(BamHI/HindIII) | <i>CDC123</i><br>(BamHI/HindIII)                       | 3C             |
| pWS1483    | <i>prha-mbp-GCD11</i>                  | pJOE2955<br>(BamHI/HindIII)   | <i>GCD11</i><br>(BamHI/HindIII)                        | 3C             |
| pWS1957    | <i>prha-mbp-GCD11-RBS-his6-CDC123</i>  | pWS1483<br>(HindIII)          | <i>RBS-his6-<br/>CDC123</i><br>(HindIII)               | 3C             |
| pEG202 (3) | <i>pADH-lexA-MCS, HIS3, 2μ</i>         |                               |                                                        | 4A             |
| pJG4-5 (3) | <i>pGAL-NLS-AD-HA-MCS, TRP1, 2μ</i>    |                               |                                                        | 4A             |
| pWS1463    | <i>pADH-lexA-CDC123</i>                | pEG202<br>(EcoRI/XhoI)        | <i>CDC123</i><br>(EcoRI/XhoI)                          | 4A             |
| pWS1513    | <i>pGAL-NLS-AD-HA-GCD11</i>            | pJG4-5<br>(EcoRI/XhoI)        | <i>GCD11</i><br>( <i>bp1-1584</i> )<br>(EcoRI/SalI)    | 4A             |
| pWS1535    | <i>pADH-lexA-SUI3</i>                  | pEG202<br>(EcoRI/XhoI)        | <i>SUI3</i><br>(MunI/XhoI)                             | 4A             |
| pWS1537    | <i>pADH-lexA-SUI2</i>                  | pEG202<br>(EcoRI/XhoI)        | <i>SUI2</i><br>(EcoRI/XhoI)                            | 4A             |
| pWS3413    | <i>pGAL-NLS-AD-HA-GCD11(aa410-527)</i> | pJG4-5<br>(EcoRI/XhoI)        | <i>GCD11</i><br>( <i>bp1228-1584</i> )<br>(EcoRI/SalI) | 4A             |
| pWS3473    | <i>pGAL-NLS-AD-HA-GCD11(aa1-514)</i>   | pJG4-5<br>(EcoRI/XhoI)        | <i>GCD11(bp1-1542+Stop)</i><br>(EcoRI/SalI)            | 4A             |
| pWS3917    | <i>pADH-lexA-hD123</i>                 | pEG202<br>(EcoRI/XhoI)        | <i>hD123</i><br>(EcoRI/XhoI)                           | 4A             |

**Table S3. Antibodies**

| antibody            | description                                                                     | used for immunoprecipitation in Figure | used for Western blot in Figure |
|---------------------|---------------------------------------------------------------------------------|----------------------------------------|---------------------------------|
| anti-Cdc123         | affinity-purified polyclonal rabbit antiserum (this study)                      | -                                      | 3A, 4C, 5A                      |
| anti-flag           | M2, mouse monoclonal (Sigma-Aldrich)                                            | 2C, 4C, 5A (agarose conjugate)         | 2C, 4C, 5A                      |
| anti-Gcd11          | polyclonal rabbit antiserum (4)                                                 | -                                      | 2D, 2E, 5D                      |
| anti-Gcd11          | affinity-purified polyclonal rabbit antiserum (this study)                      | -                                      | 3A, 3C                          |
| anti-ha             | 12CA5, mouse monoclonal                                                         | -                                      | 3B, 4A                          |
| anti-his            | Tetra-His antibody, mouse monoclonal (Qiagen)                                   | -                                      | 3C                              |
| anti-myc            | 9E10, mouse monoclonal                                                          | 2A, 3A                                 | 2A, 3A                          |
| anti-Sui2           | polyclonal rabbit antiserum (5)                                                 | 2D, 2E                                 | 1E, 2A, 2D, 2E, 3A, 5D          |
| anti-Sui2           | polyclonal rabbit antiserum (this study)                                        | -                                      | 2C, 4C, 5A                      |
| anti-Sui2- <b>P</b> | anti-eIF2 $\alpha$ [phosphoS52] polyclonal rabbit antibody (Invitrogen, 44728G) | -                                      | 1E                              |
| anti-Sui3           | polyclonal rabbit antiserum (6)                                                 | 2D, 2E                                 | 2A, 2D, 2E, 3A, 5D              |
| anti-Sui3           | polyclonal rabbit antiserum (this study)                                        | -                                      | 2C, 4C, 5A                      |

## Supplemental References

1. von der Haar, T., and McCarthy, J. E. (2002) Intracellular translation initiation factor levels in *Saccharomyces cerevisiae* and their role in cap-complex function. *Mol Microbiol* **46**, 531-544
2. Hinnebusch, A. G. (1985) A hierarchy of trans-acting factors modulates translation of an activator of amino acid biosynthetic genes in *Saccharomyces cerevisiae*. *Mol Cell Biol* **5**, 2349-2360
3. Ausubel, F. M., Brent, R., Kingston, R. E., Moore, D. D., Seidman, J. G., Smith, J. A., and Struhl, K. (2005) *Current Protocols in Molecular Biology* (Harkins, E. W., Ed.), John Wiley & Sons, Inc.
4. Hannig, E. M., Cigan, A. M., Freeman, B. A., and Kinzy, T. G. (1993) GCD11, a negative regulator of GCN4 expression, encodes the gamma subunit of eIF-2 in *Saccharomyces cerevisiae*. *Mol Cell Biol* **13**, 506-520
5. Cigan, A. M., Pabich, E. K., Feng, L., and Donahue, T. F. (1989) Yeast translation initiation suppressor *sui2* encodes the alpha subunit of eukaryotic initiation factor 2 and shares sequence identity with the human alpha subunit. *Proc Natl Acad Sci U S A* **86**, 2784-2788
6. Hashimoto, N. N., Carnevali, L. S., and Castilho, B. A. (2002) Translation initiation at non-AUG codons mediated by weakened association of eukaryotic initiation factor (eIF) 2 subunits. *Biochem J* **367**, 359-368
